# Supplementary material for: Serological responses and vaccine effectiveness for extended COVID-19 vaccine schedules in England
Source: Springer Nature journal article supplement (doi:10.1038/s41467-021-27410-5), 2021-12-10
Supplement: MOESM1 [file 41467_2021_27410_MOESM1_ESM.pdf]

## Supplementary Material

**Supplementary Table 1:** Demographics of individuals in the CONSENSUS study, by vaccine and age group.

| Vaccine & age group                         | contribution      | N   | age            | sex (if known) | ethnicity (if known) | past infection |
|---------------------------------------------|-------------------|-----|----------------|----------------|----------------------|----------------|
|                                             |                   |     | median (IQR)   | n male (%)     | n non-white (%)      | n (%)          |
| AstraZeneca, extended schedule, ages 50-64  | all recruited     | 170 | 54 (52 - 57)   | 81 (48.8%)     | 89 (52.4%)           | 56 (32.9%)     |
|                                             | ≥2 dose 1 samples | 111 | 55 (53 - 58)   | 51 (46.4%)     | 48 (43.2%)           | 36 (32.4%)     |
|                                             | ≥1 dose 2 sample  | 80  | 54 (53 - 57.5) | 39 (49.4%)     | 26 (32.5%)           | 23 (28.8%)     |
| AstraZeneca, extended schedule, ages 65-79  | all recruited     | 147 | 70 (68 - 73)   | 68 (46.3%)     | 36 (24.7%)           | 25 (17%)       |
|                                             | ≥2 dose 1 samples | 121 | 70 (68 - 73)   | 54 (44.6%)     | 26 (21.7%)           | 20 (16.5%)     |
|                                             | ≥1 dose 2 sample  | 111 | 70 (68 - 73)   | 47 (42.3%)     | 19 (17.3%)           | 16 (14.4%)     |
| Astra Zeneca, extended schedule, ages 80-89 | all recruited     | 12  | 84 (82 - 85.5) | 5 (41.7%)      | 2 (16.7%)            | 1 (8.3%)       |
|                                             | ≥2 dose 1 samples | 10  | 83 (82 - 85)   | 3 (30%)        | 1 (10%)              | 1 (10%)        |
|                                             | ≥1 dose 2 sample  | 9   | 82 (82 - 84)   | 3 (33.3%)      | 1 (11.1%)            | 1 (11.1%)      |
| Pfizer, extended schedule, ages 50-64       | all recruited     | 1   | 61             | 0              |                      | 0              |
|                                             | ≥2 dose 1 samples | 1   | 61             | 0              |                      | 0              |
|                                             | ≥1 dose 2 sample  | 1   | 61             | 0              |                      | 0              |
| Pfizer, extended schedule, ages 65-79       | all recruited     | 260 | 72 (69 - 74)   | 117 (45%)      | 28 (10.9%)           | 26 (10%)       |
|                                             | ≥2 dose 1 samples | 211 | 71 (69 - 74)   | 95 (45%)       | 19 (9.1%)            | 19 (9%)        |
|                                             | ≥1 dose 2 sample  | 225 | 72 (69 - 74)   | 102 (45.3%)    | 22 (9.9%)            | 21 (9.3%)      |
| Pfizer, extended schedule, ages 80-89       | all recruited     | 72  | 82 (81 - 84)   | 31 (43.1%)     | 7 (9.9%)             | 9 (12.5%)      |
|                                             | ≥2 dose 1 samples | 63  | 82 (81 - 84)   | 25 (39.7%)     | 6 (9.7%)             | 7 (11.1%)      |
|                                             | ≥1 dose 2 sample  | 56  | 83 (81 - 84)   | 22 (39.3%)     | 4 (7.3%)             | 5 (8.9%)       |
| Pfizer, standard schedule, ages 65-79       | all recruited     | 59  | 75 (74 - 77)   | 28 (47.5%)     | 6 (10.3%)            | 7 (11.9%)      |
|                                             | ≥2 dose 1 samples | 1   | 66             | 0              | 0                    | 0              |
|                                             | ≥1 dose 2 sample  | 59  | 75 (74 - 77)   | 28 (47.5%)     | 6 (10.3%)            | 7 (11.9%)      |
| Pfizer, standard schedule, ages 80-89       | all recruited     | 29  | 82 (81 - 85)   | 14 (48.3%)     | 3 (10.3%)            | 1 (3.4%)       |
|                                             | ≥2 dose 1 samples | 0   |                |                |                      |                |
|                                             | ≥1 dose 2 sample  | 28  | 82 (80.5 - 85) | 14 (50%)       | 3 (10.7%)            | 0 (0%)         |

**Supplementary Table 2: Test negative case control results showing adjusted odds ratios (OR) and vaccine effectiveness (VE) post first dose and post second dose according to intervals between doses for Pfizer vaccine in different age cohorts.**

|                                                                                                               | Pfizer dose | days between doses | days since dose | controls | cases            | OR (95% CI)      | VE (95% CI)  |
|---------------------------------------------------------------------------------------------------------------|-------------|--------------------|-----------------|----------|------------------|------------------|--------------|
| Age 80+ and first vaccine dose before January 4th 2021 or unvaccinated . Cases and controls from Dec 8th 2020 |             |                    | unvaccinated    | 15936    | 9178             | base             | base         |
|                                                                                                               | 1           |                    | 0-3             | 281      | 172              | 1.23 (1.01-1.5)  |              |
|                                                                                                               |             |                    | 4-13            | 862      | 731              | 1.29 (1.16-1.44) |              |
|                                                                                                               |             |                    | 14-27           | 754      | 467              | 0.9 (0.8-1.02)   | 10% (-2-20)  |
|                                                                                                               |             |                    | >=28            | 1528     | 269              | 0.45 (0.38-0.53) | 55% (47-62)  |
|                                                                                                               | 2           | 19-29              | >=14            | 2219     | 144              | 0.21 (0.17-0.26) | 79% (74-83)  |
|                                                                                                               |             | 30-44              | >=14            | 6        | 0                |                  |              |
|                                                                                                               |             | 45-64              | >=14            | 22       | 0                |                  |              |
| 65-84                                                                                                         |             | >=14               | 522             | 4        | 0.1 (0.03-0.28)  | 90% (72-97)      |              |
|                                                                                                               | 85+         | >=14               | 13              | 0        |                  |                  |              |
| Age 80+ and first vaccinated from Jan 4th 2021 or unvaccinated , cases and controls from Jan 4th 2021         |             |                    | unvaccinated    | 5676     | 3881             | base             | base         |
|                                                                                                               | 1           |                    | 0-3             | 424      | 267              | 0.98 (0.83-1.15) |              |
|                                                                                                               |             |                    | 4-13            | 1277     | 699              | 0.93 (0.83-1.05) |              |
|                                                                                                               |             |                    | 14-27           | 1580     | 398              | 0.59 (0.51-0.68) | 41% (32-49)  |
|                                                                                                               |             |                    | >=28            | 3315     | 385              | 0.58 (0.48-0.69) | 42% (31-52)  |
|                                                                                                               | 2           | 19-29              | >=14            | 212      | 22               | 0.23 (0.12-0.44) | 77% (56-88)  |
|                                                                                                               |             | 30-44              | >=14            | 5        | 0                |                  |              |
|                                                                                                               |             | 45-64              | >=14            | 42       | 1                | 0.18 (0.02-1.34) | 82% (-34-98) |
| 65-84                                                                                                         |             | >=14               | 1289            | 30       | 0.1 (0.06-0.17)  | 90% (83-94)      |              |
|                                                                                                               | 85+         | >=14               | 83              | 2        | 0.06 (0.01-0.27) | 94% (73-99)      |              |
| Age 65-79 and first vaccinated from Jan 4th 2021 or unvaccinated , cases and controls from Jan 4th 2021       |             |                    | unvaccinated    | 76821    | 26463            | base             | base         |
|                                                                                                               | 1           |                    | 0-3             | 1536     | 600              | 1.3 (1.18-1.43)  |              |
|                                                                                                               |             |                    | 4-13            | 4338     | 1242             | 1.06 (0.99-1.14) |              |
|                                                                                                               |             |                    | 14-27           | 4896     | 640              | 0.57 (0.52-0.63) | 43% (37-48)  |
|                                                                                                               |             |                    | >=28            | 11053    | 745              | 0.47 (0.42-0.52) | 53% (48-58)  |
|                                                                                                               | 2           | 19-29              | >=14            | 388      | 33               | 0.23 (0.15-0.34) | 77% (66-85)  |
|                                                                                                               |             | 30-44              | >=14            | 49       | 0                |                  |              |
|                                                                                                               |             | 45-64              | >=14            | 483      | 7                | 0.08 (0.04-0.17) | 92% (83-96)  |
| 65-84                                                                                                         |             | >=14               | 5247            | 118      | 0.11 (0.08-0.14) | 89% (86-92)      |              |
|                                                                                                               | 85+         | >=14               | 174             | 7        | 0.14 (0.06-0.3)  | 86% (70-94)      |              |
| Age 50-64 and first vaccinated from Feb 1st 2021 or unvaccinated , cases and controls from Feb 1st 2021       |             |                    | unvaccinated    | 136905   | 33904            | base             | base         |
|                                                                                                               | 1           |                    | 0-3             | 1478     | 377              | 1.09 (0.97-1.22) |              |
|                                                                                                               |             |                    | 4-13            | 3599     | 831              | 1.04 (0.96-1.12) |              |
|                                                                                                               |             |                    | 14-27           | 4116     | 457              | 0.53 (0.48-0.59) | 47% (41-52)  |
|                                                                                                               |             |                    | >=28            | 9300     | 702              | 0.49 (0.45-0.53) | 51% (47-55)  |
|                                                                                                               | 2           | 19-29              | >=14            | 83       | 4                | 0.12 (0.04-0.33) | 88% (67-96)  |
|                                                                                                               |             | 30-44              | >=14            | 114      | 7                | 0.26 (0.12-0.56) | 74% (44-88)  |
|                                                                                                               |             | 45-64              | >=14            | 643      | 24               | 0.11 (0.08-0.17) | 89% (83-92)  |
| 65-84                                                                                                         |             | >=14               | 3977            | 127      | 0.08 (0.06-0.09) | 92% (91-94)      |              |
|                                                                                                               | 85+         | >=14               | 110             | 3        | 0.06 (0.02-0.19) | 94% (81-98)      |              |

**Supplementary Table 3: Test negative case control results showing adjusted odds ratios (OR) and vaccine effectiveness (VE) post first dose and post second dose according to intervals between doses for Astra Zeneca vaccine in different age cohorts.**

|                                                                                                         | AZ dose | days between doses | days since dose | controls | cases            | OR (95% CI)      | VE (95% CI)  |
|---------------------------------------------------------------------------------------------------------|---------|--------------------|-----------------|----------|------------------|------------------|--------------|
| Age 80+ and first vaccinated from Jan 4th 2021 or unvaccinated , cases and controls from Jan 4th 2021   |         |                    | unvaccinated    | 5676     | 3881             | base             | base         |
|                                                                                                         | 1       |                    | 0-3             | 424      | 228              | 0.74 (0.62-0.88) |              |
|                                                                                                         |         |                    | 4-13            | 853      | 545              | 1.03 (0.9-1.19)  |              |
|                                                                                                         |         |                    | 14-27           | 957      | 333              | 0.78 (0.66-0.93) | 22% (7-34)   |
|                                                                                                         |         |                    | >=28            | 1986     | 237              | 0.58 (0.47-0.71) | 42% (29-53)  |
|                                                                                                         | 2       | 19-29              | >=14            | 53       | 1                | 0.04 (0-0.28)    | 96% (72-100) |
|                                                                                                         |         | 30-44              | >=14            | 5        | 1                |                  |              |
|                                                                                                         |         | 45-64              | >=14            | 92       | 1                | 0.04 (0.01-0.32) | 96% (68-99)  |
| 65-84                                                                                                   |         | >=14               | 574             | 31       | 0.18 (0.11-0.32) | 82% (68-89)      |              |
|                                                                                                         | 85+     | >=14               | 39              | 2        | 0.12 (0.03-0.52) | 88% (48-97)      |              |
| Age 65-79 and first vaccinated from Jan 4th 2021 or unvaccinated , cases and controls from Jan 4th 2021 |         |                    | unvaccinated    | 76821    | 26463            | base             | base         |
|                                                                                                         | 1       |                    | 0-3             | 3692     | 636              | 0.68 (0.62-0.75) |              |
|                                                                                                         |         |                    | 4-13            | 6261     | 1631             | 1.1 (1.03-1.17)  |              |
|                                                                                                         |         |                    | 14-27           | 7070     | 937              | 0.67 (0.61-0.73) | 33% (27-39)  |
|                                                                                                         |         |                    | >=28            | 17000    | 1045             | 0.48 (0.44-0.54) | 52% (46-56)  |
|                                                                                                         | 2       | 19-29              | >=14            | 247      | 30               | 0.34 (0.23-0.53) | 66% (47-77)  |
|                                                                                                         |         | 30-44              | >=14            | 101      | 4                | 0.27 (0.1-0.75)  | 73% (25-90)  |
|                                                                                                         |         | 45-64              | >=14            | 945      | 68               | 0.39 (0.3-0.53)  | 61% (47-70)  |
| 65-84                                                                                                   |         | >=14               | 7556            | 435      | 0.26 (0.21-0.31) | 74% (69-79)      |              |
|                                                                                                         | 85+     | >=14               | 270             | 20       | 0.27 (0.17-0.44) | 73% (56-83)      |              |
| Age 50-64 and first vaccinated from Feb 1st 2021 or unvaccinated , cases and controls from Feb 1st 2021 |         |                    | unvaccinated    | 136905   | 33904            | base             | base         |
|                                                                                                         | 1       |                    | 0-3             | 6895     | 1012             | 0.7 (0.65-0.75)  |              |
|                                                                                                         |         |                    | 4-13            | 12120    | 2584             | 1.1 (1.05-1.16)  |              |
|                                                                                                         |         |                    | 14-27           | 14597    | 1491             | 0.62 (0.58-0.66) | 38% (34-42)  |
|                                                                                                         |         |                    | >=28            | 34222    | 3633             | 0.58 (0.54-0.61) | 42% (39-46)  |
|                                                                                                         | 2       | 19-29              | >=14            | 84       | 18               | 0.48 (0.29-0.82) | 52% (18-71)  |
|                                                                                                         |         | 30-44              | >=14            | 219      | 33               | 0.45 (0.31-0.66) | 55% (34-69)  |
|                                                                                                         |         | 45-64              | >=14            | 2311     | 313              | 0.3 (0.26-0.34)  | 70% (66-74)  |
| 65-84                                                                                                   |         | >=14               | 7443            | 782      | 0.23 (0.21-0.26) | 77% (74-79)      |              |
|                                                                                                         | 85+     | >=14               | 165             | 25       | 0.3 (0.19-0.46)  | 70% (54-81)      |              |
