# Supplementary material for: Serological responses and vaccine effectiveness for extended COVID-19 vaccine schedules in England
Source: Springer Nature journal article supplement (doi:10.1038/s41467-021-27410-5), 2021-12-10
Supplement: MOESM2 [file 41467_2021_27410_MOESM2_ESM.pdf]

## Peer Review File

---

Serological responses and vaccine effectiveness demonstrate the value of extended COVID-19 vaccine schedules in England

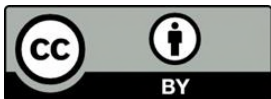

**Open Access** This file is licensed under a Creative Commons Attribution 4.0 International License, which permits use, sharing, adaptation, distribution and reproduction in any medium or format, as long as you give appropriate credit to the original author(s) and the source, provide a link to the Creative Commons license, and indicate if changes were made. In the cases where the authors are anonymous, such as is the case for the reports of anonymous peer reviewers, author attribution should be to 'Anonymous Referee' followed by a clear attribution to the source work. The images or other third party material in this file are included in the article's Creative Commons license, unless indicated otherwise in a credit line to the material. If material is not included in the article's Creative Commons license and your intended use is not permitted by statutory regulation or exceeds the permitted use, you will need to obtain permission directly from the copyright holder. To view a copy of this license, visit <http://creativecommons.org/licenses/by/4.0/>.

Editorial Note: This manuscript has been previously reviewed at another journal that is not operating a transparent peer review scheme. This document only contains reviewer comments and rebuttal letters for versions considered at Nature Communications.

Reviewers' Comments:

Reviewer #3:

Remarks to the Author:

The authors have adequately addressed most of the comments. The study results do not allow a full appraisal of the decision to delay the second vaccine dose. Thus, study conclusions cannot support such policy (as mentioned in lines 44, 283, and 352). These statements may wrongly imply that the policy taken by most other countries with regards to timing of second dose was incorrect. Given that most authors are affiliated with Public Health England that also funded the study, conclusions should be presented in a more unequivocal and objective manner

## **REVIEWERS' COMMENTS**

### **Reviewer #3 (Remarks to the Author):**

**The authors have adequately addressed most of the comments. The study results do not allow a full appraisal of the decision to delay the second vaccine dose. Thus, study conclusions cannot support such policy (as mentioned in lines 44, 283, and 352). These statements may wrongly imply that the policy taken by most other countries with regards to timing of second dose was incorrect. Given that most authors are affiliated with Public Health England that also funded the study, conclusions should be presented in a more unequivocal and objective manner**

In light of the reviewers comments we have edited the manuscript to the following:

#### Abstract:

“Our findings suggest higher effectiveness against infection using an extended vaccine schedule. Given global vaccine constraints, these results are relevant to policymakers, especially with highly transmissible variants and rising incidence in many countries.”

#### Discussion:

*“Our findings however, show sustained high levels of antibodies after the first dose to 12 weeks and is supported by the high one dose vaccine effectiveness estimates which were maintained till the second doses were given. ~~This evaluation suggests that overall the benefits of extending dosing intervals outweigh the risks from waning immunity in the UK.~~”*

*“Our findings suggest higher effectiveness against infection using an extended vaccine schedule. Given the global vaccine constraints, these results are relevant to policymakers in low and middle income countries especially in the context of highly transmissible variants and rising incidence in many parts of the world.”*
